**Assessment of Environmental and Occupational Exposure while Working with *Candida auris* a Multidrug Resistant (MDR) Fungus in the Animal Facility.**

**Keywords:** *Candida auris*, Biocontainment, Real-time PCR, Animal Facility, Biosafety level 2.

**Word Count:**

Steven R. Torres<sup>1,2+</sup>, Heather C. Kim<sup>1,2+</sup>, Lynn Leach<sup>1</sup>, Sudha Chaturvedi<sup>1</sup>, Corey J. Bennett<sup>1</sup>, David J. Hill<sup>1</sup> and Magdia De Jesus<sup>1,2\*</sup>

<sup>1</sup>Division of Infectious Diseases, Wadsworth Center, New York State Department of Health, Albany NY USA. <sup>2</sup> Department of Biomedical Sciences, University at Albany, School of Public Health, Albany, New York, USA

+ Both authors contributed equally to this publication

Address correspondence to:

Magdia De Jesus, [mdejesus2@albany.edu](mailto:mdejesus2@albany.edu).

\*Present address: 120 New Scotland Avenue, Albany, NY 12208

## ABSTRACT

In less than a decade since its identification in 2009, the emerging fungal pathogen *Candida auris* has become a major public health threat due to its multidrug resistant (MDR) phenotype, high transmissibility, and high mortality. Unlike any other *Candida* species, *C. auris* has acquired high levels of resistance to an already limited arsenal of antifungals. As an emerging pathogen, there are currently a limited number of documented murine models of *C. auris* infection. These animal models use inoculums as high as  $10^7$ - $10^8$  cells per mouse, and the environmental and occupational exposure of working with these models has not been clearly defined. Using an intravenous model of *C. auris* infection, this study determined that shedding of the organism is dose-dependent. *C. auris* was detected in the cage bedding when mice were infected with  $10^7$  and  $10^8$  cells, but not with doses of  $10^5$  and  $10^6$  cells. Potential for exposure to *C. auris* during necropsies and when working with infected tissues was also demonstrated. To mitigate these potential exposures, a rigorous “buddy system” workflow, biomonitoring and disinfection procedures were developed that can be used to prevent accidental exposures when using small animal models of *C. auris* infection.

## INTRODUCTION

Since its identification in 2009, the emerging fungal pathogen *Candida auris* has become a major public health threat, due to its status as a multidrug resistant (MDR) fungus with high levels of resistance to an already limited arsenal of antifungals, such as the azoles and polyenes.<sup>[1-4]</sup> Minimal inhibitory concentrations (MICs) for antifungals used against *C. auris* have been reported to be as high as 256 mg/L for fluconazole and > 2 mg/L for amphotericin B.<sup>[1-5]</sup> The Centers for Disease Control (CDC) has documented that *C. auris* behaves more like transmissible bacterial multidrug resistant organisms (MDROs) such as methicillin resistant

*Staphylococcus aureus* (MRSA) than any other *Candida* species.<sup>[6]</sup> Of particular concern is that the unpredictable antifungal resistance profile of *C. auris* is also showing evidence of reduced susceptibility to the echinocandins, a third class of antifungals.<sup>[4]</sup> *C. auris* causes invasive bloodstream infections with reported mortality rates as high as 30-60% in Venezuela and India, and most recently, a reported mortality rate of up to 78% in Panama.<sup>[7-9]</sup> Although the origin of *C. auris* is unknown, infections with this organism have been documented on five continents in at least 18 countries, including the United States.<sup>[7, 8, 10-18]</sup>

*C. auris* has a predilection for the skin, and recent studies have suggested that transmission and colonization can occur rapidly after a few days or even a few hours of exposure.<sup>[6]</sup> *C. auris* is also alarmingly persistent in the environment and can spread rapidly in hospital and nursing home settings.<sup>[19, 20]</sup> *C. auris* is often misidentified as *Candida haemulonii*, and without specialized laboratory methodologies such as Matrix-Assisted Laser Desorption Ionization Time of Flight Spectrometry (MALDI-TOF), diagnosis is delayed, leading to mortality rates as high as 35%.<sup>[16, 20, 21]</sup>

The current animal models of disseminated *C. auris* infection use concentrations that range from  $10^6$ - $10^8$ , along with the immunosuppressive agent cyclophosphamide. These animal models are being used to test new alternative therapeutics, including a small molecule antifungal agent called APX001A derived from the pro-drug APX001 that inhibits the fungal protein Gwt1 (glycosylphosphatidylinositol-anchored wall transfer protein 1). A novel echinocandin called rezafungin is also being tested in these animal models as a potential therapeutic to combat *C. auris*.<sup>[22-25]</sup> Because of its multidrug resistance, environmental persistence, and the large inoculum used when working with animal models infected with *C. auris*, the risk of an occupational exposure during experiments for researchers and animal care staff is still unclear.

In this study, immune-competent and neutrophil-depleted mice were infected with the *C. auris* strain M5658 that belongs to the South Asia clade. The concentrations of *C. auris* used to infect mice ranged from  $10^5$ - $10^8$  inoculum per animal to determine potential for exposure.<sup>[26]</sup> The animal holding room and procedure rooms were monitored to determine whether there was a risk for exposure during cage changes animal infections and animal procedures such as necropsies. As part of this study, a rigorous “buddy system” workflow and disinfection protocol was developed as part of safety procedures to prevent accidental exposures.

## **METHODS**

### **Animal Use Ethics Statement**

Animal experiments described in this study were approved by the Wadsworth Center’s Institutional Animal Care and Use Committee (IACUC) under protocol #18-450. The Wadsworth Center complies with the Public Health Service Policy on Humane Care and Use of Laboratory Animals and was issued assurance number A3183-01. The Wadsworth Center is fully accredited by the Association for Assessment and Accreditation of Laboratory Animal Care (AAALAC).

### **The “Buddy System” Workflow: Cage Handling and Cleaning in Animal Holding Room**

*C. auris* is recommended by the Centers for Disease Control and Prevention (CDC) to be handled at Biosafety Level 2 (ABSL-2). However, due to the limited knowledge of its environmental exposure risk in an animal research setting, the organism was handled at Animal Biosafety Level 2 (ABSL-2) with Animal Biosafety Level 3 (ABSL-3) containment practices that included enhanced Personal Protective Equipment (PPE) and a strict no open handling policy. Staff entering the animal facility used standard PPE that included booties, gloves,

bouffant, face mask, and a gown. Before entering the animal holding room, additional PPE was donned which included a second pair of booties, gloves and a snap front gown (Valumax, New York, NY).

Mice infected with *C. auris* were housed in locked micro-isolator cages (Tecniplast, West Chester, PA) with a negative air flow set to 51%, RH% 47, 75 ACH. Micro-isolator cages also provided a way to autoclave bedding and water bottles as a single unit after use, thus minimizing exposure to animal caretakers. A “buddy system” was implemented such that one person could hand the clean caging and other supplies to a second person performing the cage changes inside of the biosafety cabinet (Figure 1). This allowed for a “clean” to “dirty” workflow with minimal disruption of the laminar airflow of the biosafety cabinet. When there was a need to leave the biosafety cabinet, the exterior gloves were doffed inside of the cabinet and a new pair was donned. Blue pads placed inside of a biosafety cabinet (Kendall Healthcare Products, Mansfield, MA) were sprayed with a 10% bleach solution. It is important to note that the 10% bleach solution was made fresh daily as recommended by the CDC, since quaternary ammonia products routinely used for disinfection in animal research settings are not effective against *C. auris*.<sup>[4, 27]</sup>

To change infected animals from cages, the in-use micro-isolator cage and an empty clean cage were placed inside of the biosafety cabinet on top of the blue pads. Mice were carefully transferred to the new cage. Cage bedding that fell into the biosafety cabinet was collected by the blue pads sprayed with 10% bleach. Food was added to the new cages from a stock strictly kept inside of the biosafety cabinet. Before removal from the biosafety cabinet, cages were wiped down with 10% bleach by the individual inside the cabinet, followed by a wipe down of 70% ethanol by the individual outside the cabinet. At the end of cage changes, the blue pads were rolled up and placed into a biohazard waste bag. The biosafety cabinet and

contents were sprayed down with a 10% bleach solution and allowed to sit for 5 minutes, followed by wipe down with 70% ethanol (Figure 2). Before leaving the room, the exterior booties, gloves and gown were doffed. Dirty micro-isolator cages were sent to be autoclaved as a single sealed unit with bedding and water bottle still inside to reduce potential occupational exposures to animal care takers during the transport of cages to the autoclave. While changing animals from their cages, opened Sabouraud Dextrose Agar plates with antibiotics (40 µg/ml streptomycin; 20 U/ml penicillin; 25 µg/ml chloramphenicol; 40 µg/ml gentamicin) were positioned inside of the biosafety cabinet, as well as on the floor directly outside of the cabinet. At the completion of the work flow, these plates were incubated at 37°C for up to two weeks and checked daily to monitor growth of *C. auris*.

### **Transferring Cages from Holding to Procedure Room**

Cages with infected animals were transferred on to a laboratory cart that was placed outside of the holding room. The cart contained dry blue pads that were not sprayed with 10% bleach; the cages were placed on each shelf of the cart. Before leaving the holding room, exterior gloves, booties and gowns were removed and placed in a biohazard waste bin. The cages were then transferred from the holding room to the procedure room. When entering the procedure room, clean outer booties, outer gloves, and snap-front gown (Valumax, New York, NY) were donned. The cart with the isolator cages as well as any supplies was kept on the “clean” side of the room, indicated by a line on the floor.

### **Animal Handling during Weight Measurements**

Dry blue pads were placed inside of a biosafety cabinet to cover the surfaces and cages were placed on top. To monitor daily weights throughout the experimental trial, mice were placed into a sterilized container that contained airholes and weighed using a laboratory balance. After the

last mouse in each cage was weighed, the cage was sealed and wiped down with 10% bleach by the person inside of the cabinet, followed by a wipe with 70% ethanol by the person outside of the cabinet, before returning cages to the cart. This was repeated until all mice had been weighed. At the end of workflow, if no other procedures were done, the blue pads in the biosafety cabinet were rolled up and placed in a biohazard waste bag. The biosafety cabinet, scale, weigh chambers, and all contents were sprayed with a 10% bleach solution. After 5 minutes, the surfaces were wiped and then cleaned with a 70% ethanol solution (Figure 3). As in the holding room, open Sabouraud Dextrose Agar plates with antibiotics were positioned inside of the biosafety cabinet, as well as one on the floor directly outside of the cabinet. The plates were incubated at 37°C for up to two weeks and checked daily to monitor growth of *C. auris*.

### **Animal Infections and Necropsies**

Prior to *C. auris* infection, 100 µg of the monoclonal antibody RB6-5C8 that depletes Ly6G neutrophils (Thermo Fisher, San Diego, CA) was administered by intraperitoneal (i.p.) injection using a 25G needle (BD, Franklin Lakes, NJ). Twenty-four hours later, 100 µl of *C. auris* was administered via tail vein (i.v.) injection at concentrations of that range from 10<sup>5</sup>-10<sup>8</sup> cells. To do the infections, mice were initially anesthetized in an isoflurane chamber located outside of the biosafety cabinet. Once the mouse was anesthetized, the individual outside the biosafety cabinet placed it inside the cabinet. The individual with the hands inside the cabinet then placed the mouse into an illuminated mouse restrainer (Braintree Scientific, Braintree, MA) and placed a nose cone on the mouse. After the injection, the mice were transferred back into the cage located inside of the biosafety cabinet. The injection syringe was immediately placed in a sharps container to prevent needlestick accidents. When all mice in the group had been injected, the cage was wiped with 10% bleach by the individual inside of the cabinet, followed by a wipe with

70% ethanol by the individual outside of the cabinet. This procedure was repeated until all groups had been injected. To collect organs by necropsy, mice were euthanized in a CO<sub>2</sub> chamber located inside of the biosafety cabinet and death was confirmed by cervical dislocation. Blood was collected via cardiac puncture using a 26G needle, and spleen, liver, kidney, stomach, heart, brain and lungs were collected and placed in labeled 5 ml tubes (CELLTREAT, Pepperell, MA) containing 2 ml of HBSS with no dye on ice. Organs were ground through a 70 µm cell strainer (CELLTREAT, Pepperell, MA) using a pestle (CELLTREAT, Pepperell, MA) and twenty microliters (20 µl) of the resulting homogenate were plated on Sabouraud Dextrose Agar plates with antibiotics in triplicate and incubated at 37°C for 24-hr for colony forming units (CFU). When there was a need to leave the biosafety cabinet, the exterior gloves were doffed and a new pair donned before continuing to work. Glove changes were also done in between handling of different treatment groups to avoid cross-contamination. Surgical tools were sanitized with 10% bleach, 70% ethanol, and water between mice. The carcasses were placed into a sealable biohazard bag. At the end of the procedure, blue pads were rolled up and placed into a biohazard bag. All contents of the biosafety cabinet including the ice bucket, tubes where organs were collected, and surgical tools were sprayed with 10% bleach, allowed to sit for 5 min, and then wiped down with 70% ethanol. The biohazard bag containing the mouse carcasses was placed into a second sealable biohazard bag and then frozen prior to final disposal by incineration. The biohazard bags containing blue pads and any waste were placed into a biohazard waste bin. The biosafety cabinet was wiped down with 10% bleach and then cleaned with 70% ethanol.

### **Transfer of Animals and Tissues for Processing**

The collected and ground organ samples were moved from the ice bucket and placed inside of a specimen transport box (Nalgene, Rochester NY). The transport box was also sprayed with 10%



bleach for five min followed by 70% ethanol, wiped and placed on the clean side of the room to await transfer. When mice were returned to the holding room, the blue pads from the cart were disposed of in a biohazard bag and the cart wiped with 10% bleach followed by 70% ethanol.

## **Environmental Monitoring of *C. auris* in Holding and Procedure Rooms by qPCR**

In addition to biomonitoring the rooms by culture using the Sabouraud Dextrose Agar plates, surfaces in both the holding and procedure rooms were tested after disinfection with 10% bleach followed by 70% ethanol. Surfaces were swabbed using a sponge-stick (3M Health Care, St. Paul, MN), the sponges placed back into their respective bags, and the handles removed. The bag was folded four to five times and sealed, taking care that only the sponge touched the inside of the bag during sampling. Surfaces were again wiped with 10% bleach followed by 70% ethanol to remove residue left by the sponge-stick. The sponges were processed immediately but could be stored at 4°C in the sealed bag for no more than a week. The protocol for sponge processing was done as previously described by Leach et al., who developed the method for rapid identification of *C. auris* by PCR.<sup>[26]</sup> Briefly, in a Whirl-Pak bag (Nasco, Fort Atkinson, WI), 45 ml of 1x PBS with 0.02% of Tween 80 was added to the swabbing sponge and placed in a stomacher 400 circulator (Laboratory Supply Network, Inc., Atkinson, NH) for 1 min at 260 rpm. The liquid was centrifuged at 4,000 rpm for five min and the supernatant was decanted, leaving approximately 2 ml of liquid in the bottom of the tube. One milliliter of sample was used for plating and the other 1ml was used for DNA extraction. The sample was centrifuged at 13,000 rpm for five min and the collected pellet was washed twice then resuspended in 48 µl of PBS-BSA. The 48 µl was then transferred to a sterile screw cap tube (Heathrow Scientific, Vernon Hills, IL) containing two 3 mm glass beads and 2 µl of bicoid inhibition control plasmid

DNA ( $5 \times 10^{-3}$  ng/ $\mu$ l).<sup>[26]</sup> The tubes were then homogenized using a Vortex Genie in 10 min intervals followed by a two-min incubation on ice for a total of 50 min of homogenization. Samples were either run on qPCR immediately, or stored at -20°C. The qPCR targets the internal transcribed spacer 2 (*ITS2*) gene of *C. auris* as previously described.<sup>[26]</sup> The PCR also contains an internal bicoid inhibition control.<sup>[26]</sup> Any samples that provided a Ct value were deemed positive. Samples that gave no Ct value were found to be negative.

### **Culturing Samples Directly from Mice**

Anal and oral swabs were taken from neutrophil-depleted mice infected with *C. auris* and immune-competent control mice using Q-tips (Puritan, Guilford, ME). The Q-tips were placed in labeled 15 mL tubes, and each was submerged in 1 mL 0.02% PBS-Tween-80 and vortexed for 10 sec. The Q-tip was pressed against the sides of the tube as it was lifted out to remove as much moisture as possible. The Q-tip was discarded in a biohazard bag. The liquid collected was transferred to a labeled 2 ml screwcap tube. These samples were stored at 4°C for no longer than one week before processing was continued. The collected liquid was cultured in three ways: (1) 50  $\mu$ l of the liquid was plated on Sabouraud Dextrose Agar plates with antibiotics, (2) 50  $\mu$ l of the liquid was plated on Sabouraud Dulcitol Agar plates with 10% NaCl and antibiotics, and (3) 200  $\mu$ l was inoculated in a Sabouraud Dulcitol Agar, 10% NaCl and antibiotics broth. Plates were incubated at 40°C for two weeks. Broth cultures are incubated in a shaker at 40°C for two weeks. Cultures that were positive were verified by PCR as previously described by Leach et al.<sup>[26]</sup>

## **RESULTS**

### **Biomonitoring of *C. auris* in Animal Holding and Procedure Rooms**

Due to the persistence of *C. auris* in hospitals and nursing home settings, coupled with its resistance to antifungals, it was important to identify potential sources of exposure while working with intravenously (i.v.) infected mice. Mice were infected with *C. auris* at a range of  $10^5$ - $10^8$  cells. At concentrations of  $10^8$ , *C. auris* was fulminant to neutrophil-depleted mice, as these animals succumbed to infection in less than 24 hr. At the lowest inoculum of  $10^5$  cells, *C. auris* targets multiple organs such as the spleen, liver, kidney, stomach, heart, lungs, and brain. Immune-competent mice exhibited  $3.65 \times 10^3$  cells per organ for spleen,  $7.85 \times 10^1$  cells per organ for liver,  $2.80 \times 10^2$  cells per organ for kidney,  $1.07 \times 10^3$  cells per organ for heart, and  $4.30 \times 10^1$  cells per organ for brain. No *C. auris* was detectable in the lungs and stomach. Neutrophil-depleted mice exhibited  $1.81 \times 10^4$  cells per organ for spleen,  $1.12 \times 10^2$  cells per organ for liver,  $5.78 \times 10^2$  cells per organ for kidney,  $4.22 \times 10^1$  cells per organ for stomach,  $1.56 \times 10^3$  cells per organ for heart, and  $1.70 \times 10^3$  cells per organ for lungs. No *C. auris* was detected in the brain (Figure 4).

To assess the potential sources of *C. auris* contamination and exposure during the study, both the animal holding and procedure rooms were monitored on a daily basis for five days. Surfaces monitored for *C. auris* exposure were chosen based on their direct or indirect contact with the infected mice and hands of lab personnel. Prior to doing any work with *C. auris*, baseline environmental swabs were taken on selected surfaces (Tables 1 and 2). In the animal holding rooms where routine cage changes were done, environmental monitoring was done by swabbing the air flow nozzle of the micro-isolator cages, the floor near the biosafety cabinet, the interior door handle, the exterior door handle, and the cart used to transport mice between the holding and procedure rooms. The air flow nozzle of the mouse rack served as an indicator of whether *C. auris* could be horizontally transmitted in the animal room, as has been described for

*C. albicans*.<sup>[28]</sup> The floor of the room, door knobs and transport cart were monitored to identify potential cross-contamination that might have arisen from improper PPE use or clean up procedure. After collection, swabs were analyzed via qPCR designed specifically for the detection of *C. auris* DNA.<sup>[26]</sup> The results summarized in Table 1 reveal that there was no *C. auris* DNA detected at any time point in the holding room. To eliminate false negative results, during the qPCR a bicoid plasmid was added to the samples as positive internal control.

As in the animal holding room, environmental monitoring of the procedure room was also assessed for five days. Baseline swabs were also taken before any work with *C. auris* was done in the room. Surfaces such as the isoflurane nose cone, floor near the biosafety cabinets, chair backs, interior and exterior of the sink faucets and spigots, and interior and exterior door handles were tested. The results, summarized in Table 2, reveal that there was no *C. auris* in the animal holding room itself. However, samples of the cage bedding that held infected mice, as well as the interior of the biosafety cabinet and exterior gloves right after animal necropsies all tested positive at certain *C. auris* concentrations (Table 3; Figure 5). The results reveal that at  $10^7$ , the mouse bedding and the exterior gloves were positive with Ct values of 29.52 and 28.36, respectively. A  $10^8$  inoculum revealed that the mouse bedding, exterior gloves, and interior of the biosafety cabinet were positive with Ct values of 28.90, 29.01, and 22.93, respectively, suggesting that at these concentrations, mice begin to shed *C. auris* into the bedding. No shedding into the bedding was found at inoculums of  $10^5$  and  $10^6$ , as the PCR was negative.

Positive tests of the bedding at  $10^7$  and  $10^8$  inoculums provided the opportunity to test whether autoclaving and disinfection were efficient. To remediate *C. auris* in the bedding, the closed micro-isolator cages with water bottle attached were autoclaved at 121°C for 60 min. Both culture and PCR results were negative, revealing that autoclaving is essential for cage

disinfection. At  $10^7$  and  $10^8$  inoculums, oral and anal swabs were taken from mice to determine if these were the source of *C. auris*. Swabs were cultured in three different media, including (1) Sabouraud Dextrose Agar plates with antibiotics, (2) Sabouraud Dulcitol Agar plates with 10% NaCl and antibiotics, and (3) Sabouraud Dulcitol, 10% NaCl and antibiotics broth. The cultures did not show any growth at these concentrations after two weeks; therefore, no PCR was performed on these swabs (data not shown).

During necropsies, the interior of the biosafety cabinet was only positive for *C. auris* inoculums of  $10^8$  cells. The disinfection protocol of 10% bleach for five min followed by 70% ethanol was found to be effective, as the interior of the biosafety cabinet tested negative for *C. auris* by PCR and by culture following this procedure. Glove exteriors during necropsies were positive at  $10^6$ ,  $10^7$  and  $10^8$  concentrations, with Ct counts of 27.65, 28.36 and 29.01, respectively, indicating a potential way to contaminate the procedure room. To easily remediate this potential source of contamination, exterior gloves were removed right after the full necropsy of each mouse was done and before the workers' hands touched anything else within the biosafety cabinet. As an important reminder, the "buddy" always kept a watch for the removal of exterior gloves.

## **Post-Six Month Biomonitoring using *C. auris* Inoculums Ranging from $10^5$ - $10^8$ Cells**

To assess the effectiveness of the workflow and disinfection protocol, the procedure room was assessed six months after initial studies began. Throughout this time, at least twenty experiments were done at inoculums ranging from  $10^5$ - $10^8$ . Areas swabbed included the isoflurane nose cone, sharps container, the floor under the biosafety cabinet, the back of the chairs, the interior and exterior of the sink, the facets and spigots of the sink, the stockpot lid, and the interior and

exterior door handles, as well as the mouse restrainer. The results showed all negative Ct values for all of the areas sampled, providing a strong indicator that the workflow and disinfection protocol was effective. The results are summarized in Table 4.

## DISCUSSION

As an MDR emerging pathogen, recent work in the *C. auris* field has focused on several areas such as the development of rapid identification methods to prevent delayed treatment,<sup>[21, 26]</sup> the epidemiology and genomic analysis of *C. auris*,<sup>[1]</sup> the testing of disinfectants and best practices to reduce *C. auris* persistence, especially in healthcare settings,<sup>[10]</sup> and the testing of small molecule antifungal drugs such as APX001 and the echinocandin rezafungin as alternative therapeutics.<sup>[22, 23]</sup> Because *C. auris* is a new organism, there are a limited number of animal models. The current animal models use immunosuppressive agents such as cyclophosphamide to establish a *C. auris* infection.<sup>[22]</sup> However, to date no studies have evaluated the risk of *C. auris* as an occupational exposure during animal experiments for researchers and animal care staff.<sup>[22]</sup> As part of this study, rigorous safety procedures were developed, and *C. auris* was handled at Animal Biosafety Level 2 (ABSL-2) with Animal Biosafety Level 3 (ABSL-3) containment practices that included enhanced Personal Protective Equipment (PPE) and a strict no open handling policy. A “buddy system” was also implemented in the workflow to prevent accidental contamination of the room, as well as allowing researchers to maintain clearly defined clean and dirty work areas. The “buddy system” was also a way for workers to monitor each other and ensure that exterior PPE was changed during cage changes, infections and necropsies. Since exterior gloves tested positive at inoculums of  $10^6$ - $10^8$  cells, they were considered to be important sources of contamination, emphasizing the importance of changing exterior gloves even when moving within the biosafety cabinet. Another important part of the developed

procedures included keeping mice in micro-isolator cages, as *C. auris* was detected as positive at  $10^7$  and  $10^8$  inoculums. The closed micro-isolator cages were effective at keeping dirty bedding isolated and contained water bottles that could be autoclaved as a single unit. This system prevented exposure of animal caretakers to *C. auris* positive bedding when handling cages or if cages fell to the floor prior to autoclaving. Autoclaving was also found to be highly effective in the elimination of *C. auris* in the bedding. This study and others also found the use of 10% bleach followed by 70% ethanol to be an effective disinfectant regimen against *C. auris*,<sup>[4]</sup> as mice were clearly infected, yet all surfaces were qPCR-negative for *C. auris*.

## CONCLUSIONS

Because there are currently a limited number of documented murine models of *C. auris* infection, occupational exposure of working with these models has not been clearly defined. This study tested both the animal holding room and procedure room and evaluated potential sources of contamination and exposure during animal infections. Using an intravenous model of *C. auris* infection, shedding of the organism was determined to be dose-dependent. *C. auris* was detectable in the cage bedding when mice were infected with  $10^7$  and  $10^8$  cells, but not with doses of  $10^5$  and  $10^6$  cells. Testing by anal and oral swabs on mice was unable to identify the source of shedding. Results indicated potential for exposure with *C. auris* during necropsies and when working with infected tissues.

To mitigate these potential exposures, laboratory personnel used two layers of PPE and the lab developed a rigorous “buddy system” workflow. The “buddy’s” role was to remind the person working inside of the biosafety cabinet to change their exterior gloves, ensure that there were no needlestick accidents during infection, and enable the person to move around the procedure room and hand over cages and materials to the person working inside of the biosafety

cabinet. The rigorous use of 10% bleach and 70% ethanol and the use of closed micro-isolator cages and cage autoclaving were all determined to be essential. Assessment of the procedure room after six months of experiments using this workflow and disinfection protocol found negative Ct values, indicating that these methods were successful. In conclusion, this study showed that it is possible to work with large inoculums of *C. auris* in an animal facility, and that by following these recommendations, it can be done safely without exposing the researchers and animal caretakers to infection.

## **RECOMMENDATIONS**

For any study using a *C. auris* infection models, it is recommended that investigators handle the organism at Animal Biosafety Level 2 (ABSL-2) with Animal Biosafety Level 3 (ABSL-3) containment practices. In addition, researchers should wear two layers of protective PPE, such as double gloves, booties, and lab coats. Also, the “buddy system” and a directional workflow should be used, and micro-isolator cages should be used and autoclaved. To maintain a clean animal holding and procedure rooms, surfaces should be decontaminated with 10% bleach for five minutes followed by 70% ethanol. Following these recommendations will ensure a safe laboratory environment for both the researchers and animal care takers.

## **FUNDING AND ACKNOWLEDGMENTS REDACTED FOR BLIND**

### **REVIEW**

## **REFERENCES**

- 1 **Jeffery-Smith, A., S.K. Taori, S. Schelenz, K. Jeffery, E.M. Johnson, A. Borman et al.:** *Candida auris*: a Review of the Literature. *Clin Microbiol Rev* 31(1):(2018).



- 2     **Satoh, K., K. Makimura, Y. Hasumi, Y. Nishiyama, K. Uchida, and H. Yamaguchi:**  
Candida auris sp. nov., a novel ascomycetous yeast isolated from the external ear canal of an inpatient in a Japanese hospital. *Microbiol Immunol* 53(1): 41-44 (2009).
- 3     **Sears, D., and B.S. Schwartz:** Candida auris: An emerging multidrug-resistant pathogen. *Int J Infect Dis* 63: 95-98 (2017).
- 4     **Ku, T.S.N., C.J. Walraven, and S.A. Lee:** Candida auris: Disinfectants and Implications for Infection Control. *Front Microbiol* 9: 726 (2018).
- 5     **Berkow, E.L., and S.R. Lockhart:** Activity of novel antifungal compound APX001A against a large collection of Candida auris. *J Antimicrob Chemother* (2018).
- 6     **Forsberg, K., K. Woodworth, M. Walters, E.L. Berkow, B. Jackson, T. Chiller et al.:** Candida auris: The recent emergence of a multidrug-resistant fungal pathogen. *Med Mycol* (2018).
- 7     **Calvo, B., A.S. Melo, A. Perozo-Mena, M. Hernandez, E.C. Francisco, F. Hagen et al.:** First report of Candida auris in America: Clinical and microbiological aspects of 18 episodes of candidemia. *J Infect* 73(4): 369-374 (2016).
- 8     **Chowdhary, A., C. Sharma, S. Duggal, K. Agarwal, A. Prakash, P.K. Singh et al.:** New clonal strain of Candida auris, Delhi, India. *Emerg Infect Dis* 19(10): 1670-1673 (2013).
- 9     **Arauz, A.B., D.H. Caceres, E. Santiago, P. Armstrong, S. Arosemena, C. Ramos et al.:** Isolation of Candida auris from 9 patients in Central America: Importance of accurate diagnosis and susceptibility testing. *Mycoses* 61(1): 44-47 (2018).
- 10    **Lee, W.G., J.H. Shin, Y. Uh, M.G. Kang, S.H. Kim, K.H. Park et al.:** First three reported cases of nosocomial fungemia caused by Candida auris. *J Clin Microbiol* 49(9): 3139-3142 (2011).

- 11 **Magobo, R.E., C. Corcoran, S. Seetharam, and N.P. Govender:** Candida auris-associated candidemia, South Africa. *Emerg Infect Dis* 20(7): 1250-1251 (2014).
- 12 **Emara, M., S. Ahmad, Z. Khan, L. Joseph, I. Al-Obaid, P. Purohit et al.:** Candida auris candidemia in Kuwait, 2014. *Emerg Infect Dis* 21(6): 1091-1092 (2015).
- 13 **Schelenz, S., F. Hagen, J.L. Rhodes, A. Abdolrasouli, A. Chowdhary, A. Hall et al.:** First hospital outbreak of the globally emerging Candida auris in a European hospital. *Antimicrob Resist Infect Control* 5: 35 (2016).
- 14 **Vallabhaneni, S., A. Kallen, S. Tsay, N. Chow, R. Welsh, J. Kerins et al.:** Investigation of the First Seven Reported Cases of Candida auris, a Globally Emerging Invasive, Multidrug-Resistant Fungus - United States, May 2013-August 2016. *MMWR Morb Mortal Wkly Rep* 65(44): 1234-1237 (2016).
- 15 **Ben-Ami, R., J. Berman, A. Novikov, E. Bash, Y. Shachor-Meyouhas, S. Zakin et al.:** Multidrug-Resistant Candida haemulonii and C. auris, Tel Aviv, Israel. *Emerg Infect Dis* 23(1):(2017).
- 16 **Morales-Lopez, S.E., C.M. Parra-Giraldo, A. Ceballos-Garzon, H.P. Martinez, G.J. Rodriguez, C.A. Alvarez-Moreno et al.:** Invasive Infections with Multidrug-Resistant Yeast Candida auris, Colombia. *Emerg Infect Dis* 23(1): 162-164 (2017).
- 17 **Ruiz Gaitan, A.C., A. Moret, J.L. Lopez Hontangas, J.M. Molina, A.I. Alexandre Lopez, A.H. Cabezas et al.:** Nosocomial fungemia by Candida auris: First four reported cases in continental Europe. *Rev Iberoam Micol* 34(1): 23-27 (2017).
- 18 **Wang, X., J. Bing, Q. Zheng, F. Zhang, J. Liu, H. Yue et al.:** The first isolate of Candida auris in China: clinical and biological aspects. *Emerg Microbes Infect* 7(1): 93 (2018).

- 19 **Durante, A.J., M.H. Maloney, V.H. Leung, J.H. Razeq, and D.B. Banach:** Challenges in identifying *Candida auris* in hospital clinical laboratories: a need for hospital and public health laboratory collaboration in rapid identification of an emerging pathogen. *Infect Control Hosp Epidemiol*: 1-2 (2018).
- 20 **Chowdhary, A., C. Sharma, and J.F. Meis:** *Candida auris*: A rapidly emerging cause of hospital-acquired multidrug-resistant fungal infections globally. *PLoS Pathog* 13(5): e1006290 (2017).
- 21 **Kathuria, S., P.K. Singh, C. Sharma, A. Prakash, A. Masih, A. Kumar et al.:** Multidrug-Resistant *Candida auris* Misidentified as *Candida haemulonii*: Characterization by Matrix-Assisted Laser Desorption Ionization-Time of Flight Mass Spectrometry and DNA Sequencing and Its Antifungal Susceptibility Profile Variability by Vitek 2, CLSI Broth Microdilution, and Etest Method. *J Clin Microbiol* 53(6): 1823-1830 (2015).
- 22 **Hager, C.L., E.L. Larkin, L. Long, F. Zohra Abidi, K.J. Shaw, and M.A. Ghannoum:** In Vitro and In Vivo Evaluation of the Antifungal Activity of APX001A/APX001 against *Candida auris*. *Antimicrob Agents Chemother* 62(3):(2018).
- 23 **Larkin, E., C. Hager, J. Chandra, P.K. Mukherjee, M. Retuerto, I. Salem et al.:** The Emerging Pathogen *Candida auris*: Growth Phenotype, Virulence Factors, Activity of Antifungals, and Effect of SCY-078, a Novel Glucan Synthesis Inhibitor, on Growth Morphology and Biofilm Formation. *Antimicrob Agents Chemother* 61(5):(2017).
- 24 **Hager, C.L., E.L. Larkin, L.A. Long, and M.A. Ghannoum:** Evaluation of the efficacy of rezafungin, a novel echinocandin, in the treatment of disseminated *Candida auris* infection using an immunocompromised mouse model. *J Antimicrob Chemother* (2018).

- 25     **Lepak, A.J., M. Zhao, E.L. Berkow, S.R. Lockhart, and D.R. Andes:** Pharmacodynamic Optimization for Treatment of Invasive *Candida auris* Infection. *Antimicrob Agents Chemother* 61(8):(2017).
- 26     **Leach, L., Y. Zhu, and S. Chaturvedi:** Development and Validation of a Real-Time PCR Assay for Rapid Detection of *Candida auris* from Surveillance Samples. *J Clin Microbiol* 56(2):(2018).
- 27     **(CDC), C.f.D.C.:** "Environmental Disinfection." [Online] Available at <https://www.cdc.gov/fungal/candida-auris/c-auris-infection-control.html#disinfection>, 2018).
- 28     **Cutler, J.E., M. Corti, P. Lambert, M. Ferris, and H. Xin:** Horizontal transmission of *Candida albicans* and evidence of a vaccine response in mice colonized with the fungus. *PLoS One* 6(7): e22030 (2011).

## FIGURES

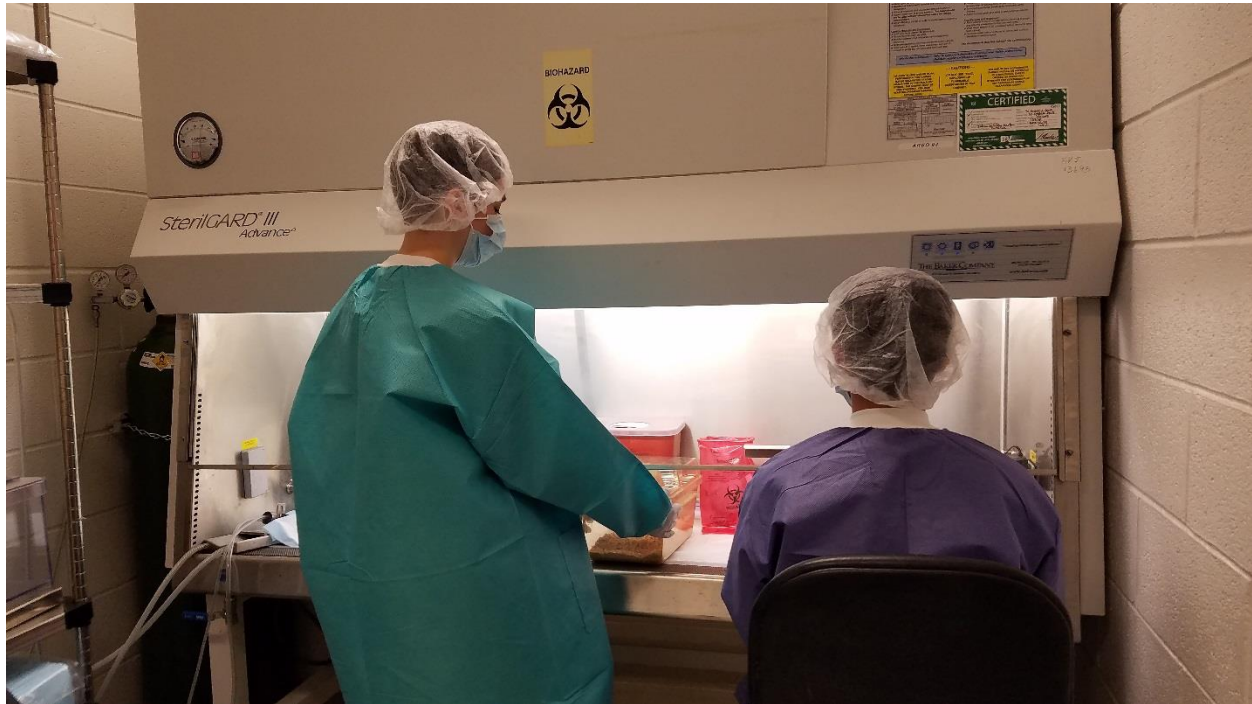

**Figure 1.** The “buddy system” work flow. A “buddy system” was implemented, such that one person hands clean caging and other supplies to a second person performing the procedures inside of the biosafety cabinet. This allows for a “clean” to “dirty” workflow with minimal disruption of the laminar airflow of the biosafety cabinet.

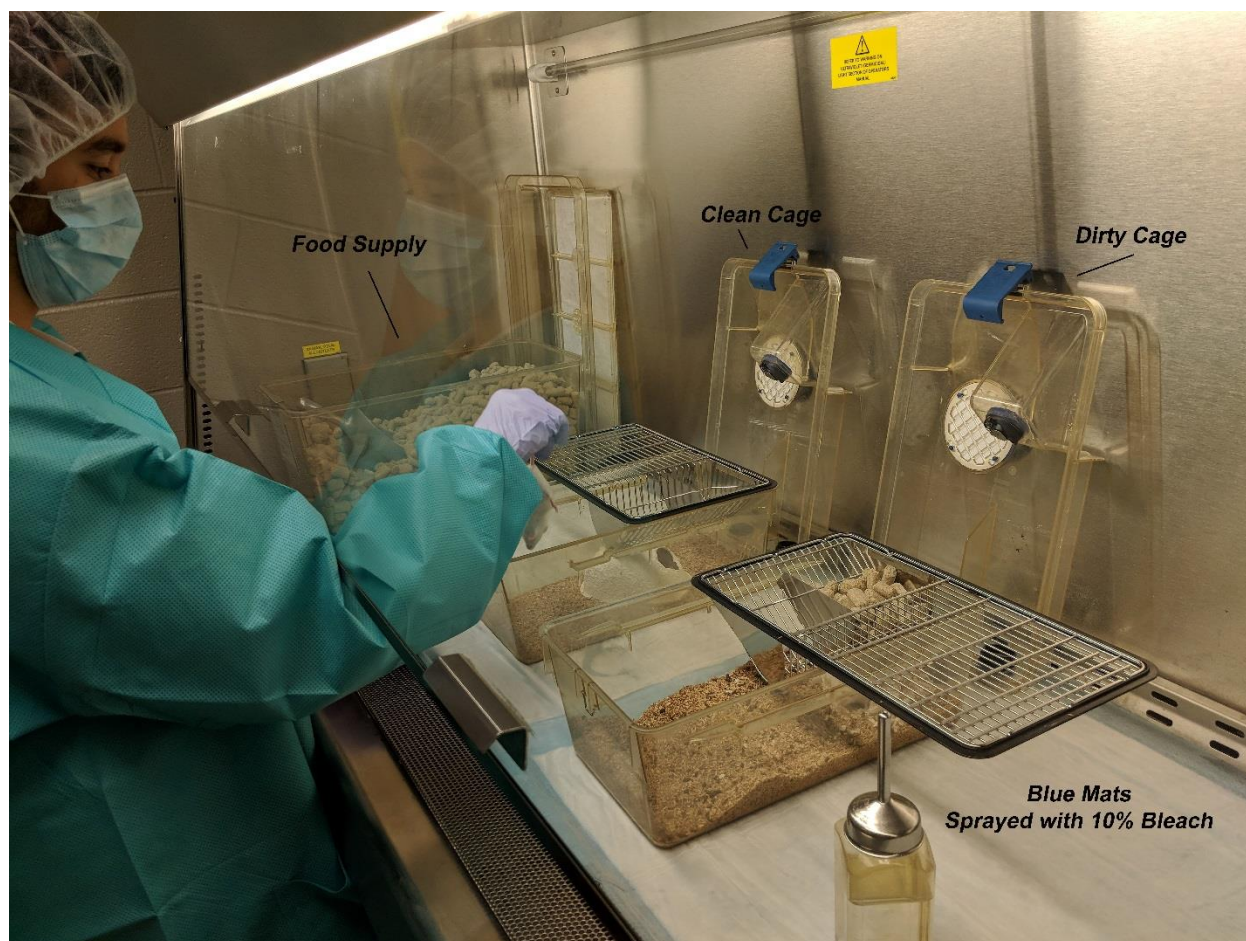

**Figure 2.** Workflow for cage changes during *C. auris* experiments. The in-use micro-isolator cage and an empty clean cage were placed inside of the biosafety cabinet atop the blue pads that were sprayed with 10% bleach. Mice were carefully transferred to the new cage and food was added to the new cages. The food stock was kept strictly kept inside of the biosafety cabinet. Before removal from the biosafety cabinet, cages were wiped down with 10% bleach by the individual inside of the cabinet, followed by 70% ethanol by the individual outside of the cabinet. At the end of cage changes, the blue pads were rolled up and placed into a biohazard waste bag. The biosafety cabinet and contents were sprayed down with a 10% bleach solution and allowed to sit for five min and wiped. Additionally, the cabinet was cleaned with a 70% ethanol solution.

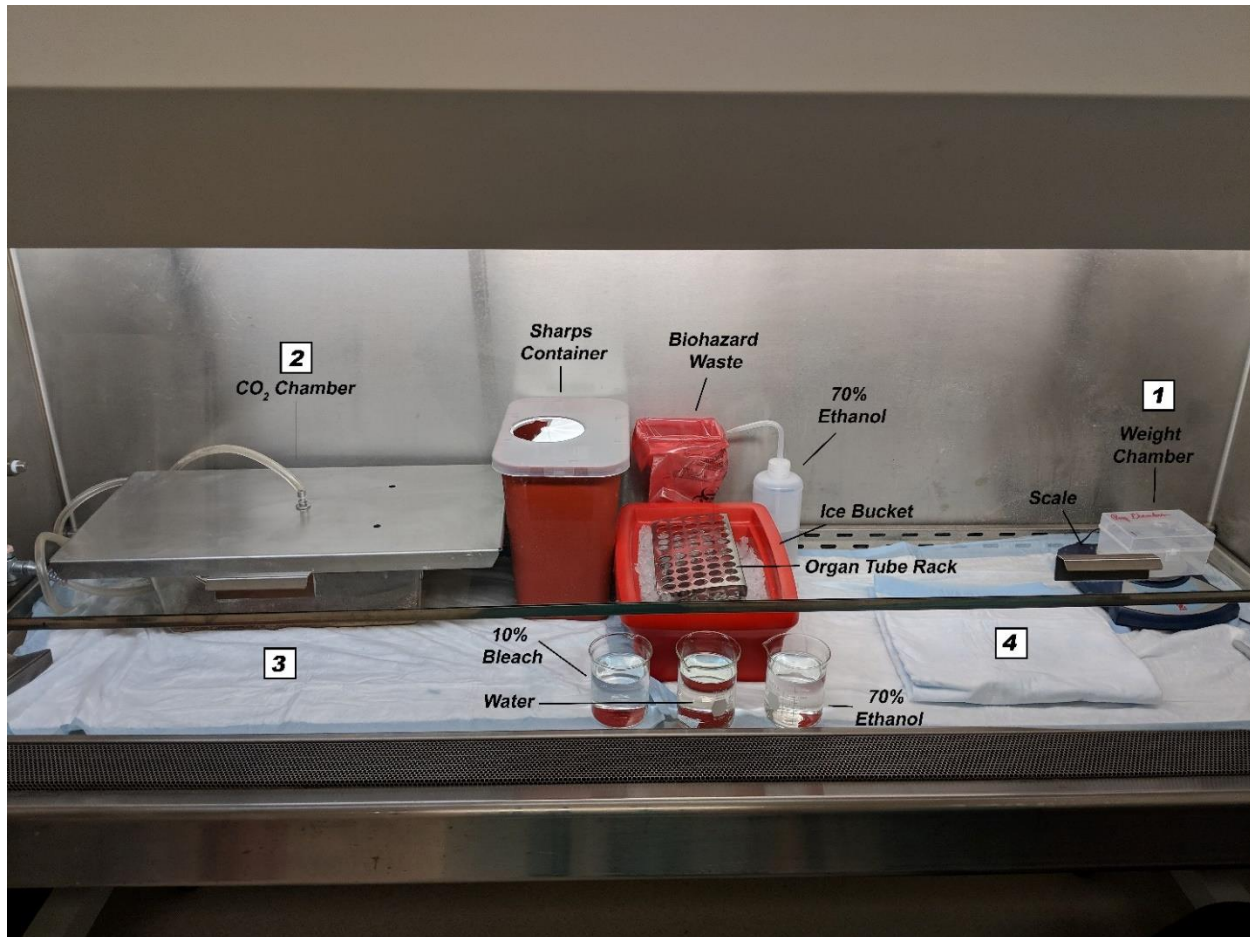

**Figure 3.** Biosafety cabinet setup within the procedure room. (1) On the right-hand side of the biosafety cabinet, mice were weighed within the chamber on the scale. Daily weights were taken for all mice in the study before moving on to the next step. (2) Mice were euthanized in the CO<sub>2</sub> chamber on the left-hand side, as the CO<sub>2</sub> source was only available on that side of the biosafety cabinet. (3) Cardiac punctures were performed directly after CO<sub>2</sub> euthanasia. Procedure needles were disposed of in the sharps container. Cervical dislocation was done as a secondary method of animal euthanasia. (4) The mice were transferred to the folded blue mat on the right. 70% ethanol was sprayed on the mouse's abdomen prior to making a midline incision for organ collection. Organs were collected and placed inside labeled tubes containing 2mL HBSS on the organ tube rack. When necropsy was finished, the carcass was placed into a sealable biohazard bag. Tools were rinsed in the following order: 10% bleach, water, then 70% ethanol between each mouse. The folded blue mat was switched to a clean side between mice. Any waste generated throughout necropsies was put into the biohazard bag in the back of the biosafety cabinet. At the end of workflow, the blue pads were rolled up and placed in the biohazard waste bag. The cabinet and all contents were sprayed with 10% bleach and allowed to sit for five min. After five min all contents and the cabinet were wiped and then cleaned using 70% ethanol.

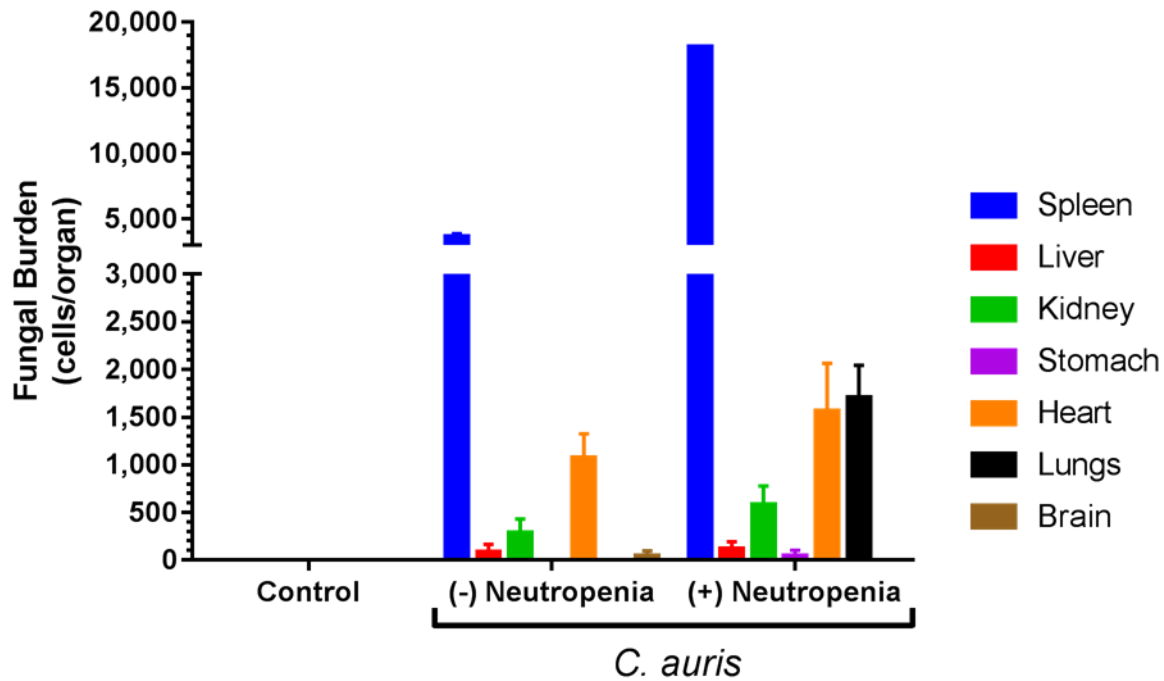

**Figure 4.** Organ fungal burdens in *C. auris* mouse model of infection. Organ fungal burden in mice infected with  $10^5$  *C. auris* by tail vein injection. Neutrophil-depleted and control mice were assessed five days post infection. Neutrophil-depleted mice were found to have additional fungal burden in the lungs (black bar). Data represent mean cells per organ; n = 4 mice per group.



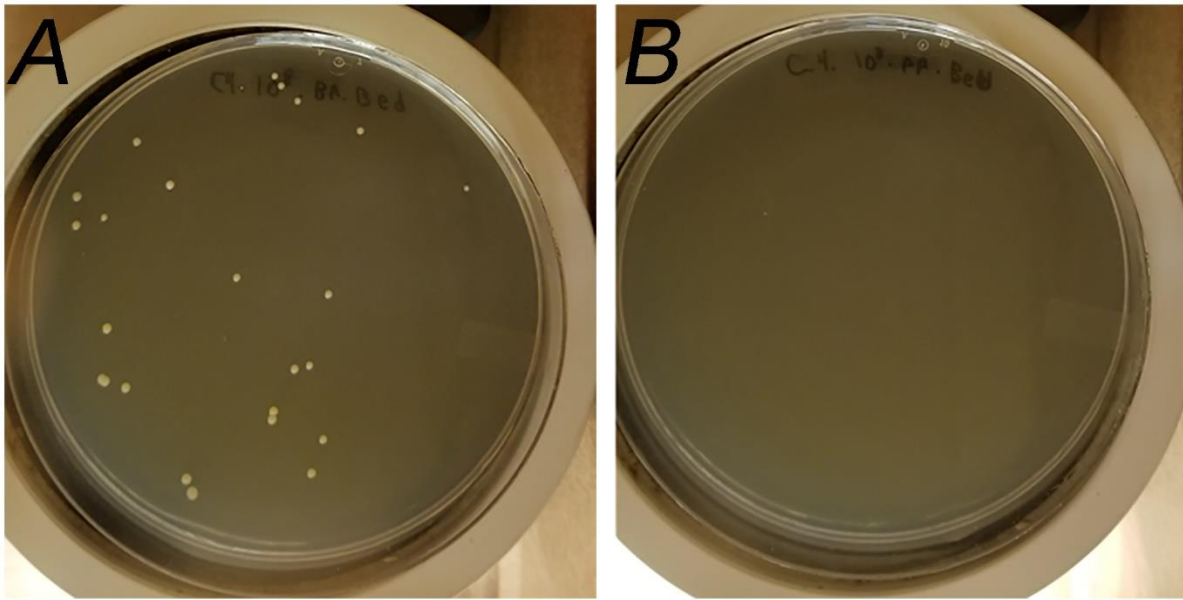

**Figure 5.** Autoclaving is an important step in disinfecting cage bedding. Neutrophil-depleted mice were infected with  $10^8$  *C. auris* by tail vein injection. (A) Before autoclaving, swabbed bedding is shown to have *C. auris* growth on Sabouraud dextrose agar plates, confirmed by PCR. (B) Bedding autoclaved in micro-isolator cages as a closed unit displays no *C. auris* growth, confirmed by PCR.

**Table 1.** Monitoring of Animal Holding Room by qPCR

|                             | <b>Target</b>   | <b>Baseline</b> | <b>Day 1</b> | <b>Day 2</b> | <b>Day 3</b> | <b>Day 4</b> | <b>Day 5</b> |
|-----------------------------|-----------------|-----------------|--------------|--------------|--------------|--------------|--------------|
| <b>Mouse Rack Nozzle</b>    | <i>C. auris</i> | (-)             | ND           | (-)          | (-)          | (-)          | (-)          |
|                             | Bicoid Plasmid  | 26.87           | ND           | 28.16        | 28.46        | 26.20        | 26.51        |
| <b>Floor near BSC</b>       | <i>C. auris</i> | (-)             | ND           | (-)          | (-)          | (-)          | (-)          |
|                             | Bicoid Plasmid  | 28.03           | ND           | 28.07        | 29.83        | 26.04        | 27.09        |
| <b>Interior Door handle</b> | <i>C. auris</i> | (-)             | (-)          | ND           | (-)          | (-)          | (-)          |
|                             | Bicoid Plasmid  | 29.38           | 28.30        | ND           | 29.54        | 29.07        | 27.74        |
| <b>Exterior Door handle</b> | <i>C. auris</i> | (-)             | (-)          | ND           | (-)          | (-)          | (-)          |
|                             | Bicoid Plasmid  | 28.63           | 27.57        | ND           | 27.88        | 29.23        | 27.88        |
| <b>Lab Cart 3-tier</b>      | <i>C. auris</i> | (-)             | (-)          | (-)          | (-)          | (-)          | (-)          |
|                             | Bicoid Plasmid  | 27.07           | 27.58        | 28.93        | 28.37        | 29.26        | 29.01        |

Monitoring of the animal facility holding room where daily cage changes are done. Ct values show (-) negative detection of *C. auris* DNA by qPCR. Bicoid positive internal control shows positive Ct values. N.D. denotes not determined.

**Table 2.** Monitoring of animal procedure room by qPCR.

|                               | <b>Target</b>   | <b>Baseline</b> | <b>Day 1</b> | <b>Day 2</b> | <b>Day 3</b> | <b>Day 4</b> | <b>Day 5</b> |
|-------------------------------|-----------------|-----------------|--------------|--------------|--------------|--------------|--------------|
| <b>Isoflurane Nose Cone</b>   | <i>C. auris</i> | (-)             | (-)          | (-)          | (-)          | (-)          | (-)          |
|                               | Bicoid Plasmid  | 26.49           | 29.07        | 28.78        | 28.27        | 28.53        | 29.20        |
| <b>Sharps Container</b>       | <i>C. auris</i> | (-)             | (-)          | (-)          | (-)          | (-)          | (-)          |
|                               | Bicoid Plasmid  | 26.94           | 28.21        | 30.43        | 28.27        | 28.46        | 29.37        |
| <b>Floor near BSC</b>         | <i>C. auris</i> | (-)             | (-)          | (-)          | (-)          | (-)          | (-)          |
|                               | Bicoid Plasmid  | 27.06           | 29.00        | 27.69        | 28.14        | 31.09        | 28.00        |
| <b>Chair Backs</b>            | <i>C. auris</i> | (-)             | (-)          | (-)          | (-)          | (-)          | (-)          |
|                               | Bicoid Plasmid  | 26.96           | 29.27        | 27.51        | 27.89        | 30.70        | 27.33        |
| <b>Interior of Sink</b>       | <i>C. auris</i> | (-)             | (-)          | (-)          | (-)          | (-)          | (-)          |
|                               | Bicoid Plasmid  | 28.56           | 29.10        | 28.05        | 28.87        | 30.56        | 26.18        |
| <b>Exterior of Sink</b>       | <i>C. auris</i> | (-)             | (-)          | (-)          | (-)          | (-)          | (-)          |
|                               | Bicoid Plasmid  | 27.96           | 28.25        | 28.09        | 29.40        | 29.33        | 27.01        |
| <b>Faucets and Spigots</b>    | <i>C. auris</i> | (-)             | (-)          | (-)          | (-)          | (-)          | (-)          |
|                               | Bicoid Plasmid  | 28.27           | 27.11        | 29.11        | 28.78        | 28.83        | 27.46        |
| <b>Stockpot Lid</b>           | <i>C. auris</i> | (-)             | (-)          | (-)          | (-)          | (-)          | (-)          |
|                               | Bicoid Plasmid  | 28.31           | 26.79        | 28.40        | 28.12        | 29.03        | 28.63        |
| <b>Interior Door handle</b>   | <i>C. auris</i> | (-)             | (-)          | (-)          | (-)          | (-)          | (-)          |
|                               | Bicoid Plasmid  | 26.18           | 27.82        | 27.67        | 27.89        | 29.60        | 28.50        |
| <b>Exterior Door handle</b>   | <i>C. auris</i> | (-)             | (-)          | (-)          | (-)          | (-)          | (-)          |
|                               | Bicoid Plasmid  | 26.74           | 29.02        | 27.77        | 28.29        | 30.85        | 27.57        |
| <b>Mouse Water Bottle Tip</b> | <i>C. auris</i> | (-)             | (-)          | (-)          | (-)          | (-)          | (-)          |
|                               | Bicoid Plasmid  | 27.38           | 28.87        | 29.72        | 28.29        | 28.82        | 31.12        |
| <b>Exterior of Mouse Cage</b> | <i>C. auris</i> | (-)             | (-)          | (-)          | (-)          | (-)          | (-)          |
|                               | Bicoid Plasmid  | 27.05           | 28.87        | 28.17        | 27.78        | 29.72        | 28.86        |

Monitoring of the animal facility procedure room post necropsy shows (-) negative Ct values for *C. auris* DNA by qPCR. Bicoid positive internal control shows positive Ct values. N.D. denotes not determined.

**Table 3.** Monitoring inside the biosafety cabinet at different inoculums by qPCR.

|                                                  | <b>Target</b>   | <b>1x10<sup>5</sup></b> | <b>1x10<sup>6</sup></b> | <b>1x10<sup>7</sup></b> | <b>1x10<sup>8</sup></b> |
|--------------------------------------------------|-----------------|-------------------------|-------------------------|-------------------------|-------------------------|
| <b>Mouse Bedding<br/>(Before Autoclave)</b>      | <i>C. auris</i> | (-)                     | (-)                     | (+)<br>29.52            | (+)<br>28.90            |
|                                                  | Bicoid Plasmid  | 28.38                   | 27.66                   | 26.8                    | 27.42                   |
| <b>Mouse Bedding<br/>(After Autoclave)</b>       | <i>C. auris</i> | ND                      | ND                      | ND                      | (-)                     |
|                                                  | Bicoid Plasmid  | ND                      | ND                      | ND                      | 24.93                   |
| <b>Exterior Gloves<br/>(Before Disinfection)</b> | <i>C. auris</i> | (-)                     | (+)<br>27.65            | (+)<br>28.36            | (+)<br>29.01            |
|                                                  | Bicoid Plasmid  | 28.21                   | 28.34                   | 28.34                   | 27.58                   |
| <b>Exterior Gloves<br/>(After Disinfection)</b>  | <i>C. auris</i> | (-)                     | (-)                     | (-)                     | (-)                     |
|                                                  | Bicoid Plasmid  | 27.65                   | 28.74                   | 28.74                   | 28.96                   |
| <b>Interior of BSC<br/>(Before Disinfection)</b> | <i>C. auris</i> | (-)                     | (-)                     | (-)                     | (+)<br>22.93            |
|                                                  | Bicoid Plasmid  | 26.90                   | 28.20                   | 28.20                   | 34.10                   |
| <b>Interior of BSC<br/>(After Disinfection)</b>  | <i>C. auris</i> | (-)                     | (-)                     | (-)                     | (-)                     |
|                                                  | Bicoid Plasmid  | 28.90                   | 27.93                   | 27.93                   | 27.36                   |

Monitoring within the biosafety cabinet within the procedure room post necropsy across several concentrations shows (+) positive Ct values for *C. auris* DNA by qPCR. Monitoring within the biosafety cabinet post-disinfection and post-autoclaving samples shows (-) negative detection of *C. auris* DNA by qPCR. Bicoid positive internal control shows positive Ct values. N.D. denotes not determined.

**Table 4.** Monitoring of the procedure room six months later.

|                             | <b>Target</b>   | <b>Ct Value</b> |
|-----------------------------|-----------------|-----------------|
| <b>Isoflurane Nose Cone</b> | <i>C. auris</i> | -               |
|                             | Bicoid Plasmid  | 27.89           |
| <b>Sharps Container</b>     | <i>C. auris</i> | -               |
|                             | Bicoid Plasmid  | 27.8            |
| <b>Floor near BSC</b>       | <i>C. auris</i> | -               |
|                             | Bicoid Plasmid  | 28.32           |
| <b>Chair Backs</b>          | <i>C. auris</i> | -               |
|                             | Bicoid Plasmid  | 28.08           |
| <b>Interior of Sink</b>     | <i>C. auris</i> | -               |
|                             | Bicoid Plasmid  | 29.88           |
| <b>Exterior of Sink</b>     | <i>C. auris</i> | -               |
|                             | Bicoid Plasmid  | 27.41           |
| <b>Faucets and Spigots</b>  | <i>C. auris</i> | -               |
|                             | Bicoid Plasmid  | 28.04           |
| <b>Stockpot Lid</b>         | <i>C. auris</i> | -               |
|                             | Bicoid Plasmid  | 27.96           |
| <b>Interior Door handle</b> | <i>C. auris</i> | -               |
|                             | Bicoid Plasmid  | 28.64           |
| <b>Exterior Door handle</b> | <i>C. auris</i> | -               |
|                             | Bicoid Plasmid  | 27.34           |
| <b>Mouse Restrainer</b>     | <i>C. auris</i> | -               |
|                             | Bicoid Plasmid  | 27.52           |

Monitoring of procedure room six months after working with *C. auris* inoculums that ranged from  $10^5$ - $10^8$  cells. All areas show (-) negative Ct values for *C. auris* DNA by qPCR. Bicoid positive internal control shows positive Ct values.
